# Supplementary material for: Imidazolium dialkylphosphates—a class of versatile, halogen-free and hydrolytically stable ionic liquids
Source: Royal Society of Chemistry journal article supplement (doi:10.1039/b611974c), 2006-12-15
Supplement: b611974c.pdf [file b611974c.pdf]

## Imidazolium dialkylphosphates - a class of versatile, halogen-free and hydrolysis stable ionic liquids

Esther Kuhlmann,<sup>a</sup> Simone Himmler,<sup>a</sup> Heidi Giebelhaus<sup>a</sup> and Peter Wasserscheid\*<sup>a</sup>

<sup>a</sup> *Lehrstuhl für Chemische Reaktionstechnik der Friedrich-Alexander-Universität Erlangen-Nürnberg, Egerlandstrasse 3, D-91058 Erlangen, Germany Fax: +499131-8527421; Tel: +499131-8527420; E-mail: wasserscheid@crt.cbi.uni-erlangen.de*

### Supporting Information

#### 1-vinylimidazole hydrogenation - additional kinetic information

For estimating the temperature dependency of the reaction rate, four experiments were carried out at different temperatures (15 °C, 22 °C, 35 °C and 40 °C) at equal catalyst concentrations (0.188wt% Pd/C) and 30 bar hydrogen pressure. Figure S1 shows the concentration-time-profiles for the hydrogenation of 1-vinylimidazole to 1-ethylimidazole at 22 °C. After the determination of the rate constants and the reaction order, 0.8 in respect to 1-vinylimidazole, we calculated an activation energy of 11 kJ/mol. This value indicates that the reaction is influenced by mass transport phenomena within the temperature range investigated. The product 1-ethylimidazole is obtained in high quality. It is separated from the catalyst by simple filtration and is distilled prior to use in ionic liquid synthesis.

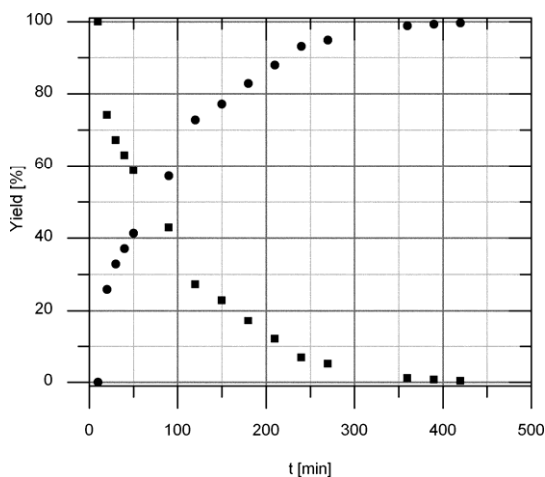

**Fig. S1** Rates of formation and depletion for 1-vinylimidazole (■) and 1-ethylimidazole (●) respectively. Reaction conditions: T = 22°C; P = 30 bar; catalyst concentration Pd/C (5 wt% on charcoal) = 0.188 wt%.
